# Supplementary material
Source: PubMed Central journal article supplement (PMC6992890)
Supplement: suppl_table_2_070319_sb.pdf [file suppl_table_2_070319_sb.pdf]

|                         |          |             |            |                        |            |             |            |
|-------------------------|----------|-------------|------------|------------------------|------------|-------------|------------|
| ENSMUSG0C SNORD24       | 2.476365 | 0.730762893 | 0.49735431 | ENSMUSG0C Cd8a         | 0.73581839 | 1.927468305 | 0.54756183 |
| ENSMUSG0C Crisp4        | 2.464669 | 0.216429869 | 0.1        | ENSMUSG0C Mir15a       | 0.3730552  | 1.919319935 | 0.75283746 |
| ENSMUSG0C 0610007N19Ri  | 2.435378 | 0.773853152 | 0.25301859 | ENSMUSG0C Cyp2d22      | 0.72742498 | 1.91478815  | 0.53686074 |
| ENSMUSG0C Derl3         | 2.43139  | 0.949379568 | 0.13497962 | ENSMUSG0C Mageh1       | 0.90098702 | 1.897997052 | 0.47237647 |
| ENSMUSG0C Dkk1          | 2.421589 | 0.47407066  | 0.31607842 | ENSMUSG0C Fxyd1        | 0.94537276 | 1.889082295 | 0.60115578 |
| ENSMUSG0C SNORA17       | 2.405053 | 0.597840729 | 0.74525158 | ENSMUSG0C Tcf7         | 0.86469242 | 1.874157239 | 0.37386451 |
| ENSMUSG0C Sult5a1       | 2.377575 | 0.785594387 | 0.1        | ENSMUSG0C Tacstd2      | 0.75587408 | 1.852751381 | 0.18530853 |
| ENSMUSG0C Rpl3l         | 2.349126 | 0.506501447 | 0.57715437 | ENSMUSG0C Gnai1        | 0.44986754 | 1.842606871 | 0.23746706 |
| ENSMUSG0C Syt4l         | 2.347981 | 0.730350159 | 0.1        | ENSMUSG0C Odam         | 0.11635715 | 1.82431699  | 0.1        |
| ENSMUSG0C Hs3t3b1       | 2.338004 | 0.977938412 | 0.83235735 | ENSMUSG0C Ms4a4d       | 0.81128485 | 1.823909659 | 0.63784678 |
| ENSMUSG0C 2810055G20Ri  | 2.297322 | 0.918268704 | 0.64674696 | ENSMUSG0C Gm10621      | 0.77569555 | 1.820117115 | 0.76195996 |
| ENSMUSG0C Calm13        | 2.258513 | 0.600981066 | 0.1        | ENSMUSG0C 3830403N18Ri | 0.89235193 | 1.810683375 | 0.92346849 |
| ENSMUSG0C Nckap1        | 2.252492 | 0.840646173 | 0.53618671 | ENSMUSG0C AC132082.1   | 0.75101102 | 1.786562525 | 0.58551672 |
| ENSMUSG0C Tmem150c      | 2.229842 | 0.948334686 | 0.24855502 | ENSMUSG0C Col4a1       | 0.80921282 | 1.786273717 | 0.41809312 |
| ENSMUSG0C Ryk           | 2.207891 | 0.9689907   | 0.30081381 | ENSMUSG0C Gm15971      | 0.66775708 | 1.755833964 | 0.50227216 |
| ENSMUSG0C Ggt7          | 2.203876 | 0.890823727 | 0.31152922 | ENSMUSG0C Slc52a3      | 0.69889511 | 1.733412124 | 0.83443529 |
| ENSMUSG0C Slc1a3        | 2.203792 | 0.254323268 | 0.10535347 | ENSMUSG0C Ptrf         | 0.65052917 | 1.733077255 | 0.36839344 |
| ENSMUSG0C Gm15530       | 2.201938 | 0.759066338 | 0.55097571 | ENSMUSG0C Chdh         | 0.80020365 | 1.728867606 | 0.14623941 |
| ENSMUSG0C snoU13        | 2.171265 | 0.298639319 | 0.35403088 | ENSMUSG0C Cox7a1       | 0.9356684  | 1.722505878 | 0.69341612 |
| ENSMUSG0C Fkbp11        | 2.16163  | 0.884323482 | 0.11015616 | ENSMUSG0C Aebp1        | 0.55794644 | 1.707289498 | 0.38714717 |
| ENSMUSG0C Zfp667        | 2.13334  | 0.528316483 | 0.42190526 | ENSMUSG0C SNORA1       | 0.44565439 | 1.70216501  | 0.59010209 |
| ENSMUSG0C AL589870.2    | 2.131696 | 0.643875126 | 0.50544427 | ENSMUSG0C Car12        | 0.22751548 | 1.699014242 | 0.10354831 |
| ENSMUSG0C RP23-4591.1.1 | 2.117295 | 0.896834366 | 0.36045328 | ENSMUSG0C Tenc1        | 0.82541423 | 1.688185512 | 0.46812029 |
| ENSMUSG0C A230072C01Rii | 2.104166 | 0.570899393 | 0.30618938 | ENSMUSG0C Ndn          | 0.64115887 | 1.684024123 | 0.13270933 |
| ENSMUSG0C Ldhc          | 2.101641 | 0.641240456 | 0.12361557 | ENSMUSG0C Cxcr7        | 0.30336804 | 1.680121276 | 0.20848873 |
| ENSMUSG0C Mup6          | 2.101201 | 0.262141515 | 0.1        | ENSMUSG0C AL772271.1   | 0.30196224 | 1.654714406 | 0.15104428 |
| ENSMUSG0C AC124489.1    | 2.094668 | 0.947457239 | 0.38582185 | ENSMUSG0C Lamc2        | 0.42586703 | 1.64666999  | 0.10752537 |
| ENSMUSG0C Gm16136       | 2.084166 | 0.744646252 | 0.11664666 | ENSMUSG0C A230083N12R  | 0.27461502 | 1.63358782  | 0.59336616 |
| ENSMUSG0C Ppp1r9a       | 2.079791 | 0.800702718 | 0.34239855 | ENSMUSG0C n-R5s31      | 0.93088045 | 1.633020835 | 0.28474329 |
| ENSMUSG0C Fam84a        | 2.061277 | 0.668198362 | 0.14267889 | ENSMUSG0C AC121599.1   | 0.93993371 | 1.625681163 | 0.41827722 |
| ENSMUSG0C SNORA40       | 2.040354 | 0.760346933 | 0.63175428 | ENSMUSG0C Stil         | 0.93050322 | 1.612333728 | 0.99340681 |
| ENSMUSG0C Gm16907       | 2.037299 | 0.994113328 | 0.51707305 | ENSMUSG0C Hspb1        | 0.55330669 | 1.611237615 | 0.41251185 |
| ENSMUSG0C Epha2         | 2.030937 | 0.296696563 | 0.14079514 | ENSMUSG0C Sfrp1        | 0.68354245 | 1.596096035 | 0.12782038 |
| ENSMUSG0C U4            | 2.016982 | 0.538321871 | 0.95226014 | ENSMUSG0C Gm16603      | 0.72041959 | 1.58840703  | 0.38132161 |
| ENSMUSG0C AC166903.1    | 2.016021 | 0.19458193  | 0.58106674 | ENSMUSG0C Lax1         | 0.60137372 | 1.544128606 | 0.36309401 |
| ENSMUSG0C Gm3625        | 2.006247 | 0.81285362  | 0.82472038 | ENSMUSG0C Rasl11a      | 0.73192051 | 1.537146129 | 0.67635975 |
| ENSMUSG0C Gm16625       | 1.998162 | 0.252742013 | 0.24119067 | ENSMUSG0C Nlrp10       | 0.56802935 | 1.530416458 | 0.68760383 |
| ENSMUSG0C Pgap1         | 1.994756 | 0.872636139 | 0.71566879 | ENSMUSG0C Foxi1        | 0.14698889 | 1.529787657 | 0.26667824 |
| ENSMUSG0C Cldn3         | 1.978077 | 0.917896086 | 0.2183157  | ENSMUSG0C Paqr9        | 0.7592008  | 1.527853337 | 0.43284215 |
| ENSMUSG0C Gm13556       | 1.975756 | 0.571511203 | 0.8814098  | ENSMUSG0C Gm10399      | 0.68076283 | 1.513019081 | 0.20022944 |
| ENSMUSG0C Rbm11         | 1.974766 | 0.964068173 | 0.18066208 | ENSMUSG0C Spink5       | 0.66575343 | 1.50581573  | 0.17856937 |
| ENSMUSG0C Fgfr1         | 1.973067 | 0.87182252  | 0.53524267 | ENSMUSG0C Tnfaip8l1    | 0.92755783 | 1.501895749 | 0.99986326 |
| ENSMUSG0C Zfp167        | 1.968109 | 0.82682944  | 0.50703517 | ENSMUSG0C Tex14        | 0.55255944 | 1.493958989 | 0.84589144 |
| ENSMUSG0C SNORD20       | 1.95628  | 0.99437726  | 0.99479024 | ENSMUSG0C Gm10277      | 0.58413344 | 1.491933983 | 0.48672636 |
| ENSMUSG0C Arhgef12      | 1.94658  | 0.96286992  | 0.67672744 | ENSMUSG0C Hist1h4a     | 0.37183281 | 1.491120116 | 0.95001809 |
| ENSMUSG0C Rnf186        | 1.931475 | 0.279962006 | 0.1450367  | ENSMUSG0C Dmwd         | 0.9474567  | 1.490077342 | 0.86455239 |
| ENSMUSG0C 2700012i20Rik | 1.924408 | 0.997914689 | 0.72491303 | ENSMUSG0C Rragb        | 0.97697546 | 1.481393442 | 0.94393826 |
| ENSMUSG0C RP24-166B2.4  | 1.924058 | 0.89104857  | 0.53205863 | ENSMUSG0C Scnn1a       | 0.89762484 | 1.473867116 | 0.71613487 |
| ENSMUSG0C Asc14         | 1.906963 | 0.279565985 | 0.29342229 | ENSMUSG0C Ska1         | 0.83690788 | 1.471492591 | 0.84029871 |
| ENSMUSG0C Lbx2          | 1.897869 | 0.7521345   | 0.34128061 | ENSMUSG0C Trg12        | 0.16504222 | 1.464236114 | 0.17030463 |
| ENSMUSG0C Gm8482        | 1.892849 | 0.887168158 | 0.59285802 | ENSMUSG0C Trdv4        | 0.21582048 | 1.453819731 | 0.32114541 |
| ENSMUSG0C Bmp7          | 1.875961 | 0.686027794 | 0.40884885 | ENSMUSG0C Polh         | 0.90385513 | 1.451731572 | 0.72163684 |
| ENSMUSG0C Abcb9         | 1.854709 | 0.91504923  | 0.42164083 | ENSMUSG0C Ramp3        | 0.58883404 | 1.451284341 | 0.64979715 |
| ENSMUSG0C Ugt1a6a       | 1.852126 | 0.959069378 | 0.72328905 | ENSMUSG0C Trbv12-2     | 0.33563193 | 1.407237032 | 0.49905922 |
| ENSMUSG0C Krba1         | 1.848016 | 0.707457961 | 0.29484733 | ENSMUSG0C Gm11458      | 0.9560125  | 1.402126567 | 0.4960083  |
| ENSMUSG0C Thns12        | 1.841563 | 0.422107163 | 0.63887424 | ENSMUSG0C Tnnt3        | 0.34134031 | 1.391921148 | 0.92812412 |
| ENSMUSG0C Zrsr1         | 1.836764 | 0.740710734 | 0.68595093 | ENSMUSG0C Crispld2     | 0.54021453 | 1.388117744 | 0.55552016 |
| ENSMUSG0C Ccdc157       | 1.835144 | 0.703762401 | 0.42807259 | ENSMUSG0C Fam187b      | 0.78463245 | 1.387842047 | 0.93705209 |
| ENSMUSG0C Sncap1        | 1.832458 | 0.859023156 | 0.28479235 | ENSMUSG0C Tnfrsf4      | 0.9165236  | 1.387511486 | 0.35058841 |
| ENSMUSG0C Ncr3-ps       | 1.816633 | 0.65718221  | 0.3614619  | ENSMUSG0C SNORA48      | 0.79804702 | 1.387472871 | 0.19072662 |
| ENSMUSG0C Tmem204       | 1.796956 | 0.612673888 | 0.24983689 | ENSMUSG0C Alpl         | 0.67258908 | 1.378945852 | 0.32059015 |
| ENSMUSG0C Apbb2         | 1.79666  | 0.99306963  | 0.49278017 | ENSMUSG0C 4930579G22Ri | 0.75177766 | 1.378905775 | 0.68097135 |
| ENSMUSG0C 4833417C18Rii | 1.793125 | 0.994156089 | 0.77048143 | ENSMUSG0C Aldh1a3      | 0.23880438 | 1.361294993 | 0.2840409  |

|                         |          |             |            |                         |            |             |            |
|-------------------------|----------|-------------|------------|-------------------------|------------|-------------|------------|
| ENSMUSG0C4933406118Rik  | 1.790585 | 0.732424789 | 0.58374151 | ENSMUSG0C Eddm3b        | 0.97006032 | 1.355767079 | 0.24870725 |
| ENSMUSG0C Crym          | 1.785261 | 0.734238842 | 0.28330529 | ENSMUSG0C Grtp1         | 0.86068116 | 1.332194445 | 0.79302887 |
| ENSMUSG0C Spats2l       | 1.783036 | 0.769114223 | 0.36673155 | ENSMUSG0C C430042M11R   | 0.25042014 | 1.323212271 | 0.48204354 |
| ENSMUSG0C Trbj1-2       | 1.777315 | 0.716843907 | 0.17916684 | ENSMUSG0C 1700016P03Ri  | 0.22290657 | 1.32261887  | 0.88298116 |
| ENSMUSG0C 1700086O06Ri  | 1.776601 | 0.747467894 | 0.59247856 | ENSMUSG0C Fzd1          | 0.71036119 | 1.303704285 | 0.86611449 |
| ENSMUSG0C 8030453O22Ri  | 1.774551 | 0.484964837 | 0.63250604 | ENSMUSG0C Mpst          | 0.90012771 | 1.289354743 | 0.89293367 |
| ENSMUSG0C Y_RNA         | 1.767974 | 0.879081073 | 0.50896845 | ENSMUSG0C Gimap5        | 0.54424613 | 1.246610707 | 0.46130175 |
| ENSMUSG0C Zfp882        | 1.762434 | 0.612142442 | 0.48022884 | ENSMUSG0C Gm13340       | 0.88352165 | 1.243826146 | 0.7275452  |
| ENSMUSG0C 6330503K22Rii | 1.75507  | 0.81961165  | 0.73427412 | ENSMUSG0C Lims2         | 0.30880511 | 1.242399126 | 0.17925417 |
| ENSMUSG0C Dsel          | 1.754167 | 0.893487851 | 0.65890988 | ENSMUSG0C 5S_rRNA       | 0.38257513 | 1.224844879 | 0.1        |
| ENSMUSG0C Clec2l        | 1.751426 | 0.545080857 | 0.19196871 | ENSMUSG0C 4930595D18Ri  | 0.50943576 | 1.20799203  | 0.47652418 |
| ENSMUSG0C Ifnb1         | 1.744212 | 0.309513348 | 0.22972169 | ENSMUSG0C Aplp1         | 0.84776312 | 1.18238646  | 0.33073937 |
| ENSMUSG0C Clec11a       | 1.72326  | 0.993891818 | 0.44729942 | ENSMUSG0C Mpz13         | 0.6990486  | 1.181997633 | 0.7870987  |
| ENSMUSG0C Serpine1      | 1.715976 | 0.905260306 | 0.22503396 | ENSMUSG0C Gm9970        | 0.68499419 | 1.150966527 | 0.55364446 |
| ENSMUSG0C 1700058P15Rii | 1.711213 | 0.796604198 | 0.70691164 | ENSMUSG0C 2900052L18Rii | 0.82290328 | 1.13689943  | 0.84645755 |
| ENSMUSG0C Dnaja4        | 1.695723 | 0.997621385 | 0.36626972 | ENSMUSG0C Mlf1ip        | 0.97027862 | 1.109321561 | 0.60589727 |
| ENSMUSG0C Pdzk1         | 1.695062 | 0.891962696 | 0.10495026 | ENSMUSG0C Lipt1         | 0.86319797 | 1.095961818 | 0.5342406  |
| ENSMUSG0C 9530082P21Rii | 1.690008 | 0.485938625 | 0.52326151 | ENSMUSG0C Lrrc49        | 0.80741146 | 1.065725162 | 0.97504774 |
| ENSMUSG0C Tigd5         | 1.685682 | 0.807493579 | 0.61253001 |                         |            |             |            |
| ENSMUSG0C Ipk3          | 1.68465  | 0.875004866 | 0.82777283 |                         |            |             |            |
| ENSMUSG0C Thbs2         | 1.657842 | 0.234712519 | 0.10670261 |                         |            |             |            |
| ENSMUSG0C Gm14221       | 1.65499  | 0.286443501 | 0.12311813 |                         |            |             |            |
| ENSMUSG0C Cdkn2b        | 1.654634 | 0.399693335 | 0.34888959 |                         |            |             |            |
| ENSMUSG0C Gpd1          | 1.653178 | 0.525686761 | 0.32730295 |                         |            |             |            |
| ENSMUSG0C Cdr2          | 1.649167 | 0.78183931  | 0.43684376 |                         |            |             |            |
| ENSMUSG0C 5730405O15Ri  | 1.648105 | 0.906444148 | 0.73737671 |                         |            |             |            |
| ENSMUSG0C Mir5133       | 1.646529 | 0.465247614 | 0.3218146  |                         |            |             |            |
| ENSMUSG0C BC022687      | 1.645606 | 0.293675868 | 0.64329016 |                         |            |             |            |
| ENSMUSG0C Ap1m2         | 1.644329 | 0.963302036 | 0.16647874 |                         |            |             |            |
| ENSMUSG0C Ttk           | 1.643786 | 0.660466273 | 0.78302483 |                         |            |             |            |
| ENSMUSG0C Gm12366       | 1.628681 | 0.997407095 | 0.63451197 |                         |            |             |            |
| ENSMUSG0C Slc1a1        | 1.624492 | 0.188982141 | 0.11752166 |                         |            |             |            |
| ENSMUSG0C Mal           | 1.619678 | 0.339730849 | 0.12009019 |                         |            |             |            |
| ENSMUSG0C Gm9796        | 1.619434 | 0.719840212 | 0.5991036  |                         |            |             |            |
| ENSMUSG0C C230091D08Rii | 1.612173 | 0.1         | 0.21345619 |                         |            |             |            |
| ENSMUSG0C Ccdc46        | 1.607991 | 0.738028745 | 0.98720422 |                         |            |             |            |
| ENSMUSG0C Liph          | 1.59766  | 0.494929734 | 0.14043894 |                         |            |             |            |
| ENSMUSG0C Rpl5          | 1.595884 | 0.841445896 | 0.97406951 |                         |            |             |            |
| ENSMUSG0C 5830444B04Rii | 1.581801 | 0.703899822 | 0.47647794 |                         |            |             |            |
| ENSMUSG0C L2hgdh        | 1.580362 | 0.839759514 | 0.67665352 |                         |            |             |            |
| ENSMUSG0C Gm17375       | 1.573176 | 0.708021158 | 0.65946236 |                         |            |             |            |
| ENSMUSG0C Mfsd2a        | 1.562563 | 0.175625152 | 0.1        |                         |            |             |            |
| ENSMUSG0C Gm17111       | 1.559929 | 0.695822615 | 0.44815415 |                         |            |             |            |
| ENSMUSG0C Gm8250        | 1.554894 | 0.943005675 | 0.44118266 |                         |            |             |            |
| ENSMUSG0C Gm15157       | 1.53995  | 0.97950683  | 0.37211581 |                         |            |             |            |
| ENSMUSG0C Gpr45         | 1.536688 | 0.317356958 | 0.10644153 |                         |            |             |            |
| ENSMUSG0C Gtdc1         | 1.531651 | 0.903283827 | 0.98256823 |                         |            |             |            |
| ENSMUSG0C Fam123a       | 1.530925 | 0.42900777  | 0.14273595 |                         |            |             |            |
| ENSMUSG0C Gm17245       | 1.527457 | 0.642681027 | 0.59540463 |                         |            |             |            |
| ENSMUSG0C Garnl3        | 1.513224 | 0.775383557 | 0.5972109  |                         |            |             |            |
| ENSMUSG0C 1110067D22Rii | 1.509161 | 0.720848009 | 0.32050475 |                         |            |             |            |
| ENSMUSG0C AC121874.1    | 1.50055  | 0.565673635 | 0.50158739 |                         |            |             |            |
| ENSMUSG0C C130040N14Ri  | 1.49288  | 0.836725551 | 0.89974881 |                         |            |             |            |
| ENSMUSG0C Arhgap33      | 1.48919  | 0.927579289 | 0.70421867 |                         |            |             |            |
| ENSMUSG0C Zwilch        | 1.483802 | 0.95699595  | 0.84510669 |                         |            |             |            |
| ENSMUSG0C SNORA17       | 1.477937 | 0.1         | 0.17047548 |                         |            |             |            |
| ENSMUSG0C SNORD86       | 1.469227 | 0.244084497 | 0.468342   |                         |            |             |            |
| ENSMUSG0C Zfp192        | 1.464745 | 0.823965114 | 0.73883867 |                         |            |             |            |
| ENSMUSG0C Gm17343       | 1.461356 | 0.280602799 | 0.18648757 |                         |            |             |            |
| ENSMUSG0C Bok           | 1.453568 | 0.674396142 | 0.15677181 |                         |            |             |            |
| ENSMUSG0C AC073553.3    | 1.445283 | 0.591421533 | 0.60614115 |                         |            |             |            |
| ENSMUSG0C Hs3st6        | 1.437871 | 0.277627154 | 0.1        |                         |            |             |            |
| ENSMUSG0C Bbs10         | 1.434857 | 0.657374493 | 0.36673774 |                         |            |             |            |

|                         |          |             |            |
|-------------------------|----------|-------------|------------|
| ENSMUSG0C Prosapip1     | 1.431087 | 0.840144507 | 0.29535763 |
| ENSMUSG0C Sorbs1        | 1.42972  | 0.802940534 | 0.49084229 |
| ENSMUSG0C Lekr1         | 1.42829  | 0.656857627 | 0.33791808 |
| ENSMUSG0C Itga8         | 1.428216 | 0.703853573 | 0.81585163 |
| ENSMUSG0C Gm5916        | 1.426903 | 0.117975785 | 0.1        |
| ENSMUSG0C Mthfd2l       | 1.418472 | 0.999177715 | 0.71455329 |
| ENSMUSG0C Dyrk4         | 1.417579 | 0.420850467 | 0.20302979 |
| ENSMUSG0C Elmo3         | 1.415421 | 0.966635362 | 0.38051672 |
| ENSMUSG0C Wdr35         | 1.410577 | 0.760411037 | 0.4928339  |
| ENSMUSG0C Atl1          | 1.410124 | 0.857609047 | 0.44395893 |
| ENSMUSG0C Tspan18       | 1.400202 | 0.28501136  | 0.26750075 |
| ENSMUSG0C Gm10101       | 1.399698 | 0.820379635 | 0.48696203 |
| ENSMUSG0C Sardh         | 1.392044 | 0.838765298 | 0.43353267 |
| ENSMUSG0C 5730480H06Rii | 1.391384 | 0.905203819 | 0.59490876 |
| ENSMUSG0C 4930578N16Ri  | 1.381726 | 0.526258653 | 0.86512494 |
| ENSMUSG0C Gm20442       | 1.377757 | 0.120419487 | 0.1        |
| ENSMUSG0C Zfp964        | 1.375983 | 0.852191066 | 0.36694694 |
| ENSMUSG0C Trav14d-3-dv8 | 1.368056 | 0.643848337 | 0.14274579 |
| ENSMUSG0C 9230105E05Rii | 1.367672 | 0.128846536 | 0.10687871 |
| ENSMUSG0C D930016D06Ri  | 1.366248 | 0.461497296 | 0.40704055 |
| ENSMUSG0C Fam89a        | 1.365853 | 0.476259247 | 0.36033999 |
| ENSMUSG0C Cabyr         | 1.363325 | 0.816736077 | 0.5266105  |
| ENSMUSG0C Ccdc57        | 1.36116  | 0.887877692 | 0.74670464 |
| ENSMUSG0C Slc39a8       | 1.357254 | 0.718934974 | 0.23301502 |
| ENSMUSG0C Cenpi         | 1.349592 | 0.936675689 | 0.76894233 |
| ENSMUSG0C Gm14325       | 1.347865 | 0.93587256  | 0.62191832 |
| ENSMUSG0C Kank1         | 1.33953  | 0.177349619 | 0.10149966 |
| ENSMUSG0C P4ha2         | 1.338862 | 0.795275477 | 0.3977661  |
| ENSMUSG0C Tmtc4         | 1.337708 | 0.882835077 | 0.51733259 |
| ENSMUSG0C Sh3pxd2a      | 1.331654 | 0.852893231 | 0.61607013 |
| ENSMUSG0C SNORD62       | 1.327961 | 0.309495882 | 0.19072664 |
| ENSMUSG0C Tmeff1        | 1.325418 | 0.449744466 | 0.19932611 |
| ENSMUSG0C Zfp82         | 1.323633 | 0.820511252 | 0.5750779  |
| ENSMUSG0C Gm16015       | 1.311888 | 0.856481815 | 0.29216277 |
| ENSMUSG0C Pkp4          | 1.310349 | 0.733503504 | 0.72359709 |
| ENSMUSG0C Zmat1         | 1.295351 | 0.842750679 | 0.58979898 |
| ENSMUSG0C Serpinf2      | 1.294341 | 0.574567976 | 0.26126506 |
| ENSMUSG0C Ttl           | 1.290768 | 0.930588176 | 0.9771463  |
| ENSMUSG0C Fbxo17        | 1.2823   | 0.886043747 | 0.24257169 |
| ENSMUSG0C Ppm1n         | 1.272285 | 0.447486725 | 0.35600969 |
| ENSMUSG0C Sh3yl1        | 1.272035 | 0.872161316 | 0.21934349 |
| ENSMUSG0C Ceacam18      | 1.267779 | 0.911349035 | 0.41203693 |
| ENSMUSG0C Heatr7b1      | 1.266011 | 0.510205501 | 0.21447559 |
| ENSMUSG0C C85492        | 1.256749 | 0.771749128 | 0.26657541 |
| ENSMUSG0C Tlcd1         | 1.253443 | 0.59857428  | 0.44650877 |
| ENSMUSG0C Rora          | 1.253092 | 0.883011621 | 0.37422347 |
| ENSMUSG0C 6330403L08Rii | 1.252026 | 0.772194833 | 0.35996132 |
| ENSMUSG0C Dennd2a       | 1.246989 | 0.504422611 | 0.36846991 |
| ENSMUSG0C Comp          | 1.245381 | 0.263894792 | 0.30178904 |
| ENSMUSG0C Sgtb          | 1.233468 | 0.390285192 | 0.29908844 |
| ENSMUSG0C D630037F22Rii | 1.232564 | 0.944801297 | 0.72543421 |
| ENSMUSG0C Zfp937        | 1.221551 | 0.942991498 | 0.37841122 |
| ENSMUSG0C Polr3g        | 1.220956 | 0.86017658  | 0.48750431 |
| ENSMUSG0C 9130019O22Ri  | 1.215076 | 0.74292052  | 0.77487439 |
| ENSMUSG0C Gm10644       | 1.214053 | 0.469655436 | 0.37473208 |
| ENSMUSG0C Fbxo36        | 1.208388 | 0.503724712 | 0.45483234 |
| ENSMUSG0C Gm14302       | 1.205834 | 0.886679162 | 0.42660938 |
| ENSMUSG0C Fbxo44        | 1.190999 | 0.927858102 | 0.66841461 |
| ENSMUSG0C Gm5113        | 1.154364 | 0.524971781 | 0.45486543 |
| ENSMUSG0C Adora3        | 1.147689 | 0.51747143  | 0.42054024 |
| ENSMUSG0C Katnal1       | 1.09498  | 0.912096316 | 0.40498399 |
| ENSMUSG0C Atpaf1        | 1.036642 | 0.633209852 | 0.70491583 |
