# Supplementary material
Source: PubMed Central journal article supplement (PMC6992890)
Supplement: suppl_table_3_sb.pdf [file suppl_table_3_sb.pdf]

**Supplementary Table 3: Complete of the transcripts in MPs related to immune regulation.  
RPKM (Reads Per Kilobase Million)**

| Phagosome-related genes |            |              |            | Antigen processing and presentation-related genes |            |              |            | Inflammatory response-associated genes |            |              |            | Anti-inflammatory response-associated genes |             |              |             |
|-------------------------|------------|--------------|------------|---------------------------------------------------|------------|--------------|------------|----------------------------------------|------------|--------------|------------|---------------------------------------------|-------------|--------------|-------------|
| identification          | IS         | caput_corpus | CAUDA      | identification                                    | IS         | caput_corpus | CAUDA      | identification                         | IS         | caput_corpus | CAUDA      | identification                              | IS          | caput_corpus | CAUDA       |
| <i>Mrc1</i>             | 127.366875 | 111.048758   | 102.145641 | <i>Ctsb</i>                                       | 4036.72846 | 2597.87028   | 2225.18817 | <i>Ccl12</i>                           | 924.670427 | 651.045623   | 348.733336 | <i>Apoe</i>                                 | 17990.41234 | 8190.068813  | 4064.50837  |
| <i>Tcirg1</i>           | 137.902308 | 96.8423002   | 88.5278181 | <i>Ctsb</i>                                       | 783.253876 | 609.121107   | 476.108608 | <i>Cx3cr1</i>                          | 211.978588 | 112.210422   | 83.560502  | <i>Clqa</i>                                 | 3270.882108 | 2363.784642  | 1719.562215 |
| <i>Ncf1</i>             | 114.632025 | 87.8276378   | 81.4682971 | <i>Canx</i>                                       | 106.43008  | 100.464454   | 95.9882881 | <i>Cer1</i>                            | 113.057803 | 64.2523081   | 79.2481254 | <i>Tnfaip8l2</i>                            | 199.9033188 | 166.6959743  | 185.3790973 |
| <i>Ilgam</i>            | 93.925217  | 76.648355    | 80.503657  | <i>H2-M3</i>                                      | 97.9054631 | 92.6961318   | 85.2720458 | <i>Cer5</i>                            | 91.1363714 | 76.433713    | 62.200445  | <i>Slc11a1</i>                              | 127.2960616 | 86.43605268  | 60.16488263 |
| <i>Ncf4</i>             | 81.8133862 | 69.7686945   | 78.3596314 | <i>Ctsl</i>                                       | 138.890718 | 88.9816164   | 48.0123945 | <i>Ifngr2</i>                          | 90.6953755 | 76.9269976   | 63.6897186 | <i>Lgals9</i>                               | 119.7132048 | 86.67148964  | 89.4775361  |
| <i>Cd36</i>             | 113.457961 | 85.6937076   | 74.7304802 | <i>Lgmn</i>                                       | 597.361668 | 357.979143   | 299.416639 | <i>Ifnar2</i>                          | 80.6036659 | 69.5228485   | 54.2870164 | <i>Il10ra</i>                               | 108.0288058 | 104.2612238  | 94.39649923 |
| <i>Lamp2</i>            | 71.5111728 | 62.1505886   | 49.0663645 | <i>Hspa5</i>                                      | 293.380389 | 279.51018    | 257.68297  | <i>Il1a</i>                            | 68.5751131 | 39.7163231   | 19.6627852 | <i>Il10rb</i>                               | 93.96111095 | 73.6656635   | 60.3255838  |
| <i>Vamp3</i>            | 47.1538091 | 41.3592173   | 43.3154723 | <i>Pdia3</i>                                      | 234.387694 | 225.465141   | 214.593541 | <i>Cxcl10</i>                          | 48.7577473 | 34.0386428   | 17.6244638 | <i>Tgfb1</i>                                | 90.39336287 | 42.28978512  | 23.52817377 |
| <i>Atp6v1c1</i>         | 59.6379331 | 44.021912    | 43.0842671 | <i>Tap2</i>                                       | 36.7877352 | 36.9405411   | 35.7065737 | <i>Ifnar1</i>                          | 48.1756842 | 43.1296598   | 38.5613583 | <i>Il4ra</i>                                | 77.11401192 | 60.9634694   | 50.74269309 |
| <i>Irgb5</i>            | 163.615276 | 67.9732613   | 29.5850503 | <i>Hspa1b</i>                                     | 40.1123845 | 294.717819   | 151.143074 | <i>Cxcl2</i>                           | 34.0654497 | 10.7899609   | 12.5817116 | <i>Tgfb2</i>                                | 76.14066554 | 53.09421967  | 43.32963467 |
| <i>Atp6v1g1</i>         | 63.5385631 | 60.3816951   | 62.5365247 | <i>B2m</i>                                        | 5268.08362 | 5633.20491   | 4633.54226 | <i>Tnfrsf11a</i>                       | 33.200999  | 23.836193    | 28.0384188 | <i>Il21r</i>                                | 51.99566947 | 45.44140119  | 29.32759025 |
| <i>Hgs</i>              | 27.9002207 | 25.9770457   | 21.4880295 | <i>Hsp90ab1</i>                                   | 160.799799 | 228.948718   | 213.186468 | <i>Cxcl14</i>                          | 30.8818463 | 15.1660251   | 7.38488296 | <i>Cd82</i>                                 | 49.99696076 | 45.60979995  | 46.08208928 |
| <i>Atp6v1d</i>          | 22.7942899 | 19.4956409   | 22.2613636 | <i>Calr</i>                                       | 211.532246 | 214.579534   | 203.301724 | <i>Cer11l</i>                          | 25.0554656 | 14.746873    | 14.7367344 | <i>Il18bp</i>                               | 40.60345266 | 18.28893139  | 8.794121029 |
| <i>Lamp1</i>            | 643.311043 | 481.724763   | 471.528646 | <i>Tapbp</i>                                      | 157.98126  | 171.196326   | 162.145565 | <i>Il16</i>                            | 16.1927683 | 14.7829599   | 14.6632215 | <i>Lgals8</i>                               | 18.41162197 | 17.71994486  | 14.83854764 |
| <i>Atp6v0b</i>          | 204.574392 | 179.548153   | 161.236506 | <i>Hspa1a</i>                                     | 49.7851693 | 294.805374   | 154.069106 | <i>Il15ra</i>                          | 7.66490392 | 6.87002739   | 7.15580643 | <i>Cd274</i>                                | 8.209590977 | 6.675038249  | 7.856151928 |
| <i>Tr2</i>              | 133.089398 | 130.586339   | 112.011783 | <i>H2-Q6</i>                                      | 37.8906701 | 64.7938852   | 57.9895775 | <i>Il27</i>                            | 4.92126451 | 3.35300316   | 2.32119132 | <i>Il1r12</i>                               | 5.31797882  | 1.802350935  | 0.735408034 |
| <i>Atp6ap1</i>          | 156.309027 | 122.895411   | 127.073791 | <i>Hspa8</i>                                      | 83.2148455 | 112.414743   | 94.0688977 | <i>Cxcl1</i>                           | 3.75555676 | 2.21894901   | 1.3645038  | <i>Zfp36</i>                                | 1244.703305 | 2102.650576  | 1997.29728  |
| <i>Atp6v1f</i>          | 68.7466647 | 78.2068493   | 75.7076032 | <i>Psm2</i>                                       | 42.8213962 | 47.7656023   | 45.3842117 | <i>Ifnb1</i>                           | 1.7090064  | 0.31033618   | 0.18242737 | <i>Cd14</i>                                 | 525.518379  | 578.4871213  | 505.0518226 |
| <i>Atp6v0d1</i>         | 48.7215627 | 50.6342122   | 48.7340236 | <i>Hsp90aa1</i>                                   | 14.1388772 | 44.6633794   | 33.8723777 | <i>Cxcl16</i>                          | 188.499087 | 115.214802   | 83.6997359 | <i>Fcgr2b</i>                               | 135.028252  | 160.6387578  | 142.8804204 |
| <i>Dync11l1</i>         | 23.5588405 | 28.8088289   | 28.5427716 | <i>H2-K1</i>                                      | 721.163848 | 933.393411   | 949.403528 | <i>Cxcr6</i>                           | 3.41054952 | 3.20722579   | 1.79848794 | <i>Socs3</i>                                | 99.7061789  | 116.0483933  | 71.29510021 |
| <i>Cd14</i>             | 525.518379 | 578.487121   | 505.051823 | <i>H2-T23</i>                                     | 93.8951376 | 130.696298   | 129.476306 | <i>Ccl3</i>                            | 731.341012 | 981.528114   | 886.598915 | <i>Lgals3bp</i>                             | 96.82065048 | 99.43763169  | 76.78845121 |
| <i>Fcgr2b</i>           | 135.028252 | 160.638758   | 142.88042  | <i>H2-Oa</i>                                      | 32.1484236 | 88.0557506   | 88.6291238 | <i>Ccl4</i>                            | 692.738837 | 1198.28889   | 1018.00619 | <i>Tnfrsf1b</i>                             | 93.07097975 | 102.6723054  | 94.87916255 |
| <i>Atp6v1e1</i>         | 114.400539 | 130.865391   | 132.015813 | <i>Cd74</i>                                       | 22099.8265 | 32124.9658   | 36946.1548 | <i>Ccl8</i>                            | 282.297641 | 526.797384   | 207.864615 | <i>Tgfb1</i>                                | 62.25421986 | 77.87419553  | 54.00714944 |
| <i>Irgb1</i>            | 115.581956 | 128.996255   | 128.655908 | <i>H2-Eb1</i>                                     | 5310.88453 | 8563.99524   | 9936.89837 | <i>Il1b</i>                            | 236.787888 | 306.223209   | 285.230139 | <i>Pparg</i>                                | 12.50313079 | 20.89845865  | 19.5468762  |
| <i>Actb</i>             | 1664.74347 | 2567.13794   | 2845.75471 | <i>H2-Ab1</i>                                     | 5164.62778 | 8336.21641   | 9629.53874 | <i>Ccl7</i>                            | 187.024287 | 350.128223   | 323.230346 | <i>Il10</i>                                 | 3.049050669 | 3.325476033  | 1.416485799 |
| <i>Cyba</i>             | 624.700619 | 704.326416   | 816.185122 | <i>H2-Aa</i>                                      | 3684.65463 | 5727.01861   | 6772.55627 | <i>Ifngr1</i>                          | 185.996752 | 216.62996    | 216.505215 | <i>Ido1</i>                                 | 0.708731887 | 3.366907219  | 0.123438952 |
| <i>Coro1a</i>           | 457.05697  | 549.280316   | 705.639628 | <i>H2-D1</i>                                      | 768.427455 | 1057.54805   | 1250.34957 | <i>Ccl2</i>                            | 104.914983 | 173.32479    | 148.16696  | <i>Tgfb2</i>                                | 224.2375889 | 180.0613149  | 231.7947512 |
| <i>Irgb2</i>            | 199.133277 | 239.054976   | 287.542717 | <i>H2-DMa</i>                                     | 427.451412 | 590.041698   | 691.720916 | <i>Tnfrsf1b</i>                        | 93.3741861 | 102.623819   | 95.5127038 | <i>Cd52</i>                                 | 437.0739405 | 587.1558382  | 676.9824748 |
| <i>Clec7a</i>           | 257.152175 | 256.338928   | 284.246743 | <i>H2-DMb1</i>                                    | 407.722609 | 530.654804   | 691.433375 | <i>Cer12</i>                           | 90.1912546 | 92.8140948   | 78.6596361 | <i>Ndfip1</i>                               | 265.272254  | 277.6833035  | 309.9403083 |
| <i>Cybb</i>             | 216.529968 | 206.239071   | 217.158416 | <i>Irf30</i>                                      | 253.417096 | 384.168186   | 428.262538 | <i>Tnfrsf1a</i>                        | 87.4593345 | 100.974813   | 93.6702212 | <i>Lgals1</i>                               | 103.06557   | 205.4936128  | 312.1741052 |
| <i>Stx7</i>             | 152.649251 | 159.797688   | 181.061978 | <i>Psm1</i>                                       | 135.20347  | 144.87172    | 155.474755 | <i>Ccl5</i>                            | 57.8040763 | 101.724094   | 69.7555111 | <i>Il13ra1</i>                              | 54.47372553 | 54.89010787  | 55.87596717 |
| <i>Rac1</i>             | 139.178019 | 146.796526   | 149.969319 | <i>H2-DMb2</i>                                    | 49.6844778 | 122.100678   | 151.951987 | <i>Il18</i>                            | 40.3518171 | 46.2650389   | 39.553308  | <i>Il3ra</i>                                | 8.659809008 | 17.9353633   | 21.19983951 |
| <i>Tubb6</i>            | 38.0176354 | 57.7926407   | 109.785224 | <i>Klra1</i>                                      | 39.9714812 | 97.1240086   | 144.121164 | <i>Tnfrsf21</i>                        | 38.4653772 | 43.6146107   | 40.0628183 | <i>Il4il</i>                                | 7.411274968 | 12.40068625  | 13.26677011 |
| <i>Atp6v1h</i>          | 48.6857454 | 46.364905    | 60.504357  | <i>Tap1</i>                                       | 48.4652303 | 59.4164954   | 62.8135256 | <i>Il15</i>                            | 32.9234464 | 33.4658894   | 29.6382288 | <i>Cd24a</i>                                | 6.694602489 | 22.51539477  | 36.47439352 |
| <i>Ncf2</i>             | 45.1272304 | 51.6758376   | 52.7325385 | <i>Ciita</i>                                      | 34.1332777 | 50.7165346   | 55.7744152 | <i>Cxcr3</i>                           | 13.8928243 | 19.8565463   | 19.0553013 |                                             |             |              |             |
| <i>M6pr</i>             | 50.8167013 | 48.7132409   | 51.2364923 | <i>H2-K2</i>                                      | 30.9843774 | 42.6996546   | 52.2773697 | <i>Cxcr4</i>                           | 11.907725  | 18.2909482   | 10.1966661 |                                             |             |              |             |
| <i>Tubb2a</i>           | 35.4876214 | 41.0071395   | 47.8718435 | <i>Psm3</i>                                       | 39.3746072 | 41.94684     | 51.4411668 | <i>Ccl24</i>                           | 10.91721   | 34.6449236   | 31.2820443 |                                             |             |              |             |
| <i>Atp6v1b2</i>         | 42.8870484 | 42.4082184   | 46.596113  | <i>Tnf</i>                                        | 24.6534966 | 32.3925431   | 35.0908527 | <i>Cxcl9</i>                           | 5.38420603 | 6.61657874   | 3.34341862 |                                             |             |              |             |
| <i>Rab5a</i>            | 41.9150906 | 41.7587573   | 42.7592902 | <i>Hspa4</i>                                      | 23.7004884 | 25.401311    | 30.7756512 | <i>Cxcl12</i>                          | 1.63723406 | 3.62520153   | 3.3320982  |                                             |             |              |             |
| <i>Sec61b</i>           | 19.8440867 | 27.9919313   | 34.9503829 | <i>Rfxap</i>                                      | 15.0401132 | 13.8219956   | 18.2880272 | <i>Ifng</i>                            | 0.80421515 | 2.89889416   | 1.01024294 |                                             |             |              |             |
| <i>Actg1</i>            | 13.4694009 | 16.4627206   | 25.7284624 |                                                   |            |              |            | <i>Ccl6</i>                            | 165.878578 | 436.211669   | 661.068853 |                                             |             |              |             |
| <i>Tuba1b</i>           | 20.3864327 | 22.5742324   | 25.4979434 |                                                   |            |              |            | <i>Ccr2</i>                            | 145.64847  | 370.704738   | 515.179022 |                                             |             |              |             |
| <i>Sec61a1</i>          | 18.8314894 | 21.6993843   | 22.9046707 |                                                   |            |              |            | <i>Lgals3</i>                          | 135.425948 | 371.354079   | 525.198041 |                                             |             |              |             |
| <i>Tuba1a</i>           | 9.88242879 | 14.4234087   | 20.6965531 |                                                   |            |              |            | <i>Cxcl13</i>                          | 75.7427393 | 85.9913159   | 141.153622 |                                             |             |              |             |
| <i>Dync1li2</i>         | 17.0208168 | 14.5620758   | 18.9806815 |                                                   |            |              |            | <i>Ccl9</i>                            | 60.9892222 | 236.380012   | 331.045913 |                                             |             |              |             |
|                         |            |              |            |                                                   |            |              |            | <i>Il6ra</i>                           | 45.3645924 | 57.9277373   | 58.7885823 |                                             |             |              |             |
|                         |            |              |            |                                                   |            |              |            | <i>Il2rg</i>                           | 43.4802403 | 78.4681243   | 80.8061033 |                                             |             |              |             |
|                         |            |              |            |                                                   |            |              |            | <i>Il17ra</i>                          | 39.2619117 | 47.2846613   | 48.6427583 |                                             |             |              |             |
|                         |            |              |            |                                                   |            |              |            | <i>Tnfrsf13b</i>                       | 35.6638884 | 40.4409939   | 60.4568746 |                                             |             |              |             |
|                         |            |              |            |                                                   |            |              |            | <i>Tnf</i>                             | 25.10997   | 32.6748057   | 35.8285852 |                                             |             |              |             |
|                         |            |              |            |                                                   |            |              |            | <i>Ccl22</i>                           | 15.9053209 | 27.7818719   | 30.3460139 |                                             |             |              |             |
|                         |            |              |            |                                                   |            |              |            | <i>Ccl17</i>                           | 15.004145  | 32.0817829   | 34.5318533 |                                             |             |              |             |
|                         |            |              |            |                                                   |            |              |            | <i>Cer7</i>                            | 7.13655487 | 13.0359002   | 15.8420123 |                                             |             |              |             |
|                         |            |              |            |                                                   |            |              |            | <i>Il1r2</i>                           | 4.56469408 | 5.97708587   | 7.96901621 |                                             |             |              |             |
